# Supplementary material for: Adapted Behavioural Activation for Bipolar Depression: A Randomised Multiple Baseline Case Series
Source: Brain Sci. 2022 Oct 19;12(10):1407. doi: 10.3390/brainsci12101407 (PMC9599144; doi:10.3390/brainsci12101407)
Supplement: Supplementary file 1 [file brainsci-12-01407-s001.zip › brainsci-1944810-supplementary.pdf]

## Supplementary Material

### Acceptability feedback survey

Overall, how acceptable was BA-BD to you? In other words did you think that the treatment approach and activities made sense and were reasonable?

|                       |                     |                       |                 |                      |
|-----------------------|---------------------|-----------------------|-----------------|----------------------|
| 1                     | 2                   | 3                     | 4               | 5                    |
| Not at all acceptable | Slightly acceptable | Moderately acceptable | Very acceptable | Extremely acceptable |

Overall, how satisfied were you with the BA-BD programme?

|                      |                    |                      |                |                     |
|----------------------|--------------------|----------------------|----------------|---------------------|
| 1                    | 2                  | 3                    | 4              | 5                   |
| Not at all satisfied | Slightly satisfied | Moderately satisfied | Very satisfied | Extremely satisfied |

How likely would you be to recommend BA-BD to friends or family if they needed similar care or treatment?

|                    |          |                            |        |                  |
|--------------------|----------|----------------------------|--------|------------------|
| 1                  | 2        | 3                          | 4      | 5                |
| Extremely unlikely | Unlikely | Neither Likely or Unlikely | Likely | Extremely Likely |

Overall, how acceptable were the research aspects of the study to you? In other words did you think that what you were asked to do in terms of research assessments made sense and was reasonable?

|                       |                     |                       |                 |                      |
|-----------------------|---------------------|-----------------------|-----------------|----------------------|
| 1                     | 2                   | 3                     | 4               | 5                    |
| Not at all acceptable | Slightly acceptable | Moderately acceptable | Very acceptable | Extremely acceptable |

Overall, how satisfied were you with the research aspects of the study?

|                      |                    |                      |                |                     |
|----------------------|--------------------|----------------------|----------------|---------------------|
| 1                    | 2                  | 3                    | 4              | 5                   |
| Not at all satisfied | Slightly satisfied | Moderately satisfied | Very satisfied | Extremely satisfied |

How likely would you be to recommend taking part in a study like this to friends or family if they were eligible?

|                    |          |                            |        |                  |
|--------------------|----------|----------------------------|--------|------------------|
| 1                  | 2        | 3                          | 4      | 5                |
| Extremely unlikely | Unlikely | Neither Likely or Unlikely | Likely | Extremely Likely |
